# Supplementary material for: Starch-Based Hydrogel Development and Its Impact on Seed Coating Performance
Source: Research Square preprint supplement (doi:10.21203/rs.3.rs-7018925/v1), 2025-07-24
Supplement: Supplementary file 1 [file e83306438548c04d3ac70dc1.docx]

**Starch-Based Hydrogel Development and Its Impact on Seed Coating Performance**

**Raikhan Rakhmetullayeva1, Botakoz Khavilkhairat1, Assel Toktabayeva1, Nurzhan Mukhamadiyev2, Elmira Nurgaziyeva3*,  Munziya Abutalip3***

*1Department of Chemistry and Chemical Technology, Al-Farabi Kazakh National University, Almaty, 050040, Kazakhstan*

*2Kazakh Research Institute of Plant Protection and Quarantine Named After Zh. Zhiyembayev, Almaty 050070, Kazakhstan*

*3National Laboratory Astana, Nazarbayev University, Astana, 010000, Kazakhstan*

**corresponding author's email:* [*munziya.abutalip@nu.edu.kz*](mailto:munziya.abutalip@nu.edu.kz)*,* [*elmira.nurgaziyeva@nu.edu.kz*](mailto:elmira.nurgaziyeva@nu.edu.kz)


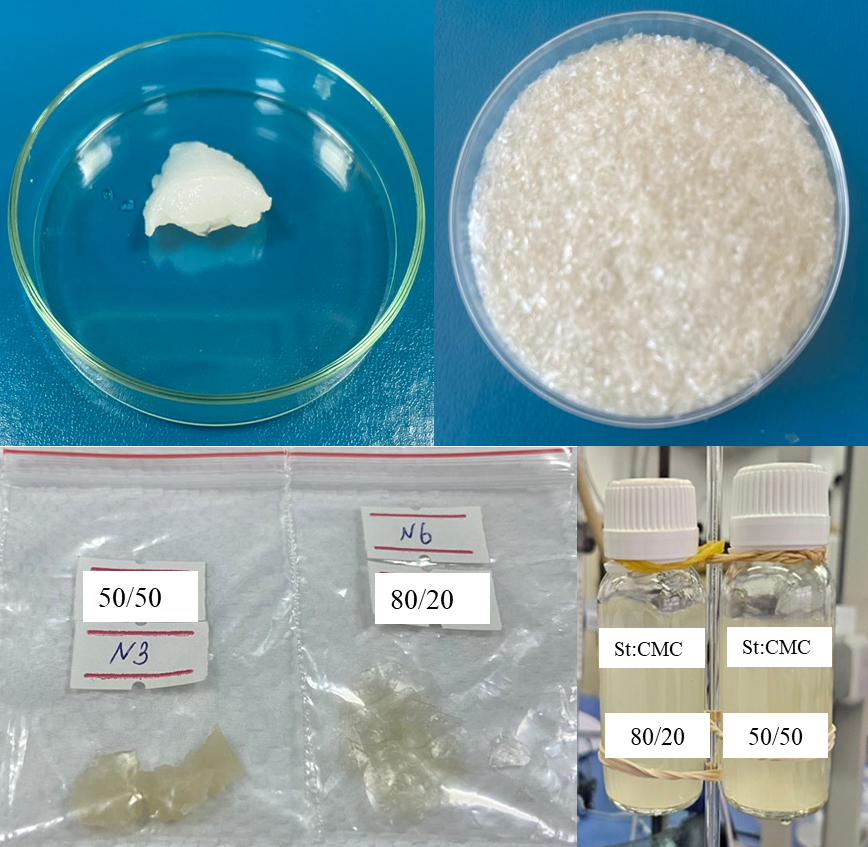


S1 – Synthesized hydrogels in swollen and dried forms


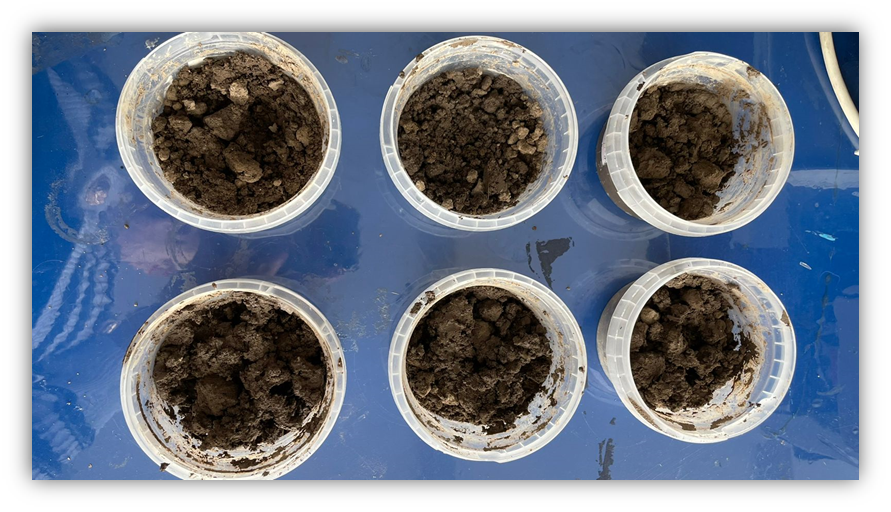


S2 – Biodegradability test performance
